# Supplementary material for: A systematic investigation of chromium and vanadium impurities in a Janus Ga2SO monolayer towards spintronic applications
Source: Royal Society of Chemistry journal article supplement (doi:10.1039/d4cp01255k), 2024-01-01
Supplement: d4cp01255k1.pdf [file d4cp01255k1.pdf]

## A systematic investigation of chromium and vanadium impurities in Janus $\text{Ga}_2\text{SO}$ monolayer towards spintronic applications

Duy Khanh Nguyen,<sup>1,2</sup> Nguyen Thanh Tien,<sup>3</sup> J. Guerrero-Sanchez,<sup>4</sup> and D. M. Hoat<sup>5,6,\*</sup>

<sup>1</sup>Laboratory for Computational Physics, Institute for Computational Science and Artificial Intelligence, Van Lang University, Ho Chi Minh City, Vietnam

<sup>2</sup>Faculty of Mechanical - Electrical and Computer Engineering, School of Technology, Van Lang University, Ho Chi Minh City, Vietnam

<sup>3</sup>College of Natural Sciences, Can Tho University, 3-2 Road, Can Tho City 900000, Vietnam

<sup>4</sup>Universidad Nacional Autónoma de México, Centro de Nanociencias y Nanotecnología, Apartado Postal 14, Ensenada, Baja California, Código Postal 22800, Mexico

<sup>5</sup>Institute of Theoretical and Applied Research, Duy Tan University, Ha Noi 100000, Viet Nam

<sup>6</sup>Faculty of Natural Sciences, Duy Tan University, Da Nang 550000, Viet Nam

\*Corresponding author: [dominhhoat@gmail.com](mailto:dominhhoat@gmail.com)

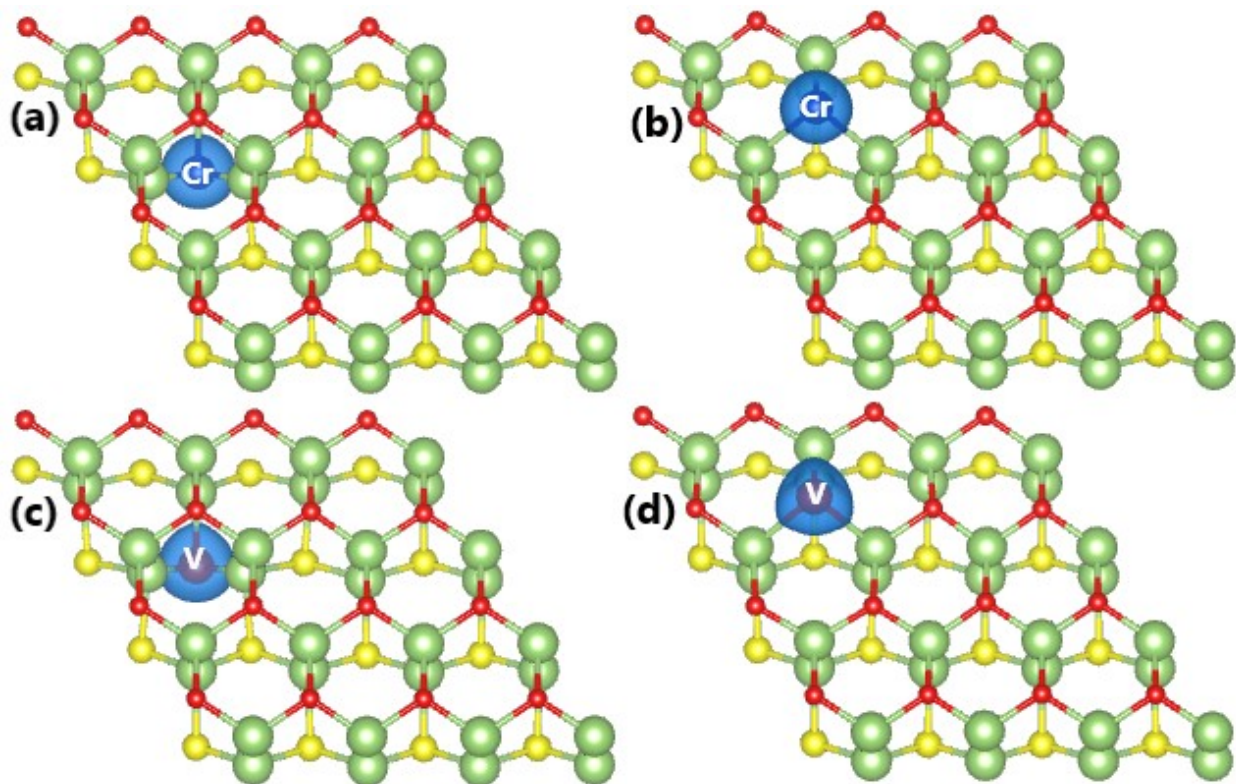

Figure S1: Spin density (Iso-surface value:  $0.02 e/\text{\AA}^3$ ) in (a)  $\text{Cr}_S$ , (b)  $\text{Cr}_O$ , (c)  $\text{V}_S$ , and (d)  $\text{V}_O$  system.

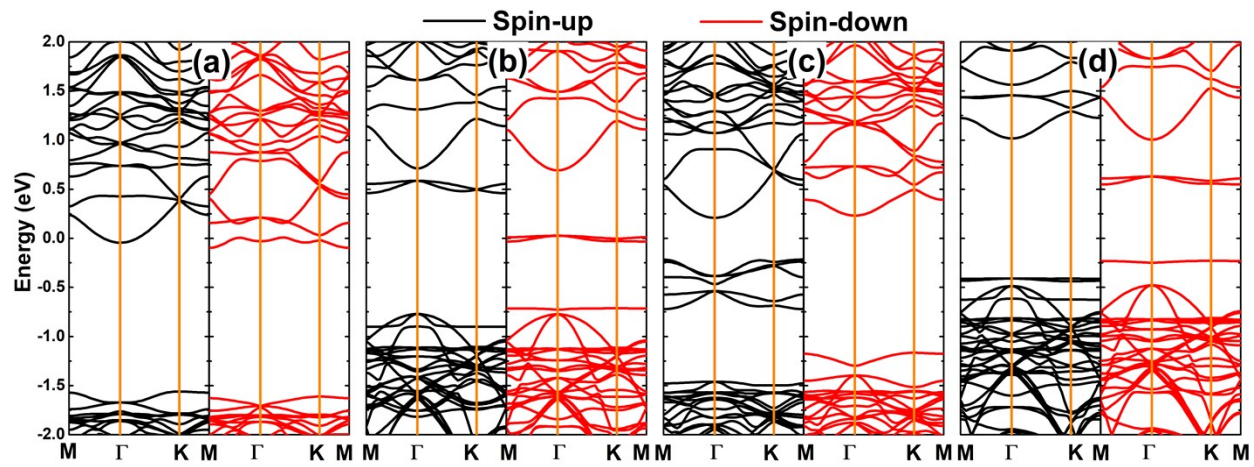

Figure S2: Spin-polarized band structure (The Fermi level is set to 0 eV) of (a) Cr<sub>S</sub>, (b) Cr<sub>O</sub>, (c) V<sub>S</sub>, and (d) V<sub>O</sub> system.

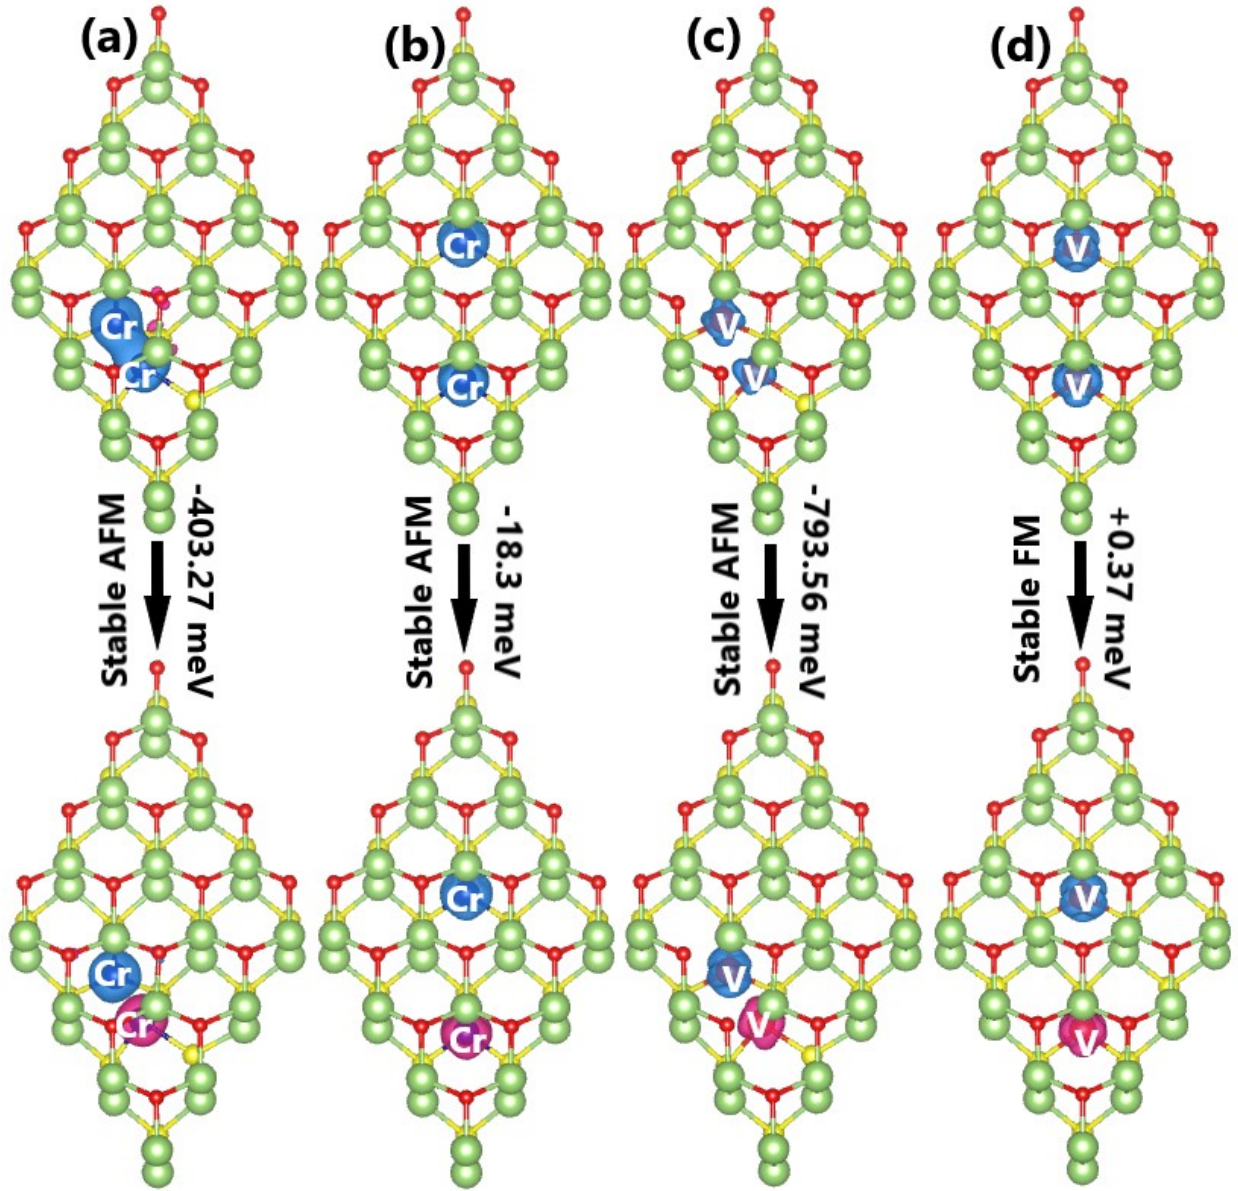

Figure S3: Energy of magnetic state transition in  $\text{Ga}_2\text{SO}$  monolayer doped with (a-b) Cr atoms and (c-d) V atoms at  $\text{Ga}_1$  sublattice.

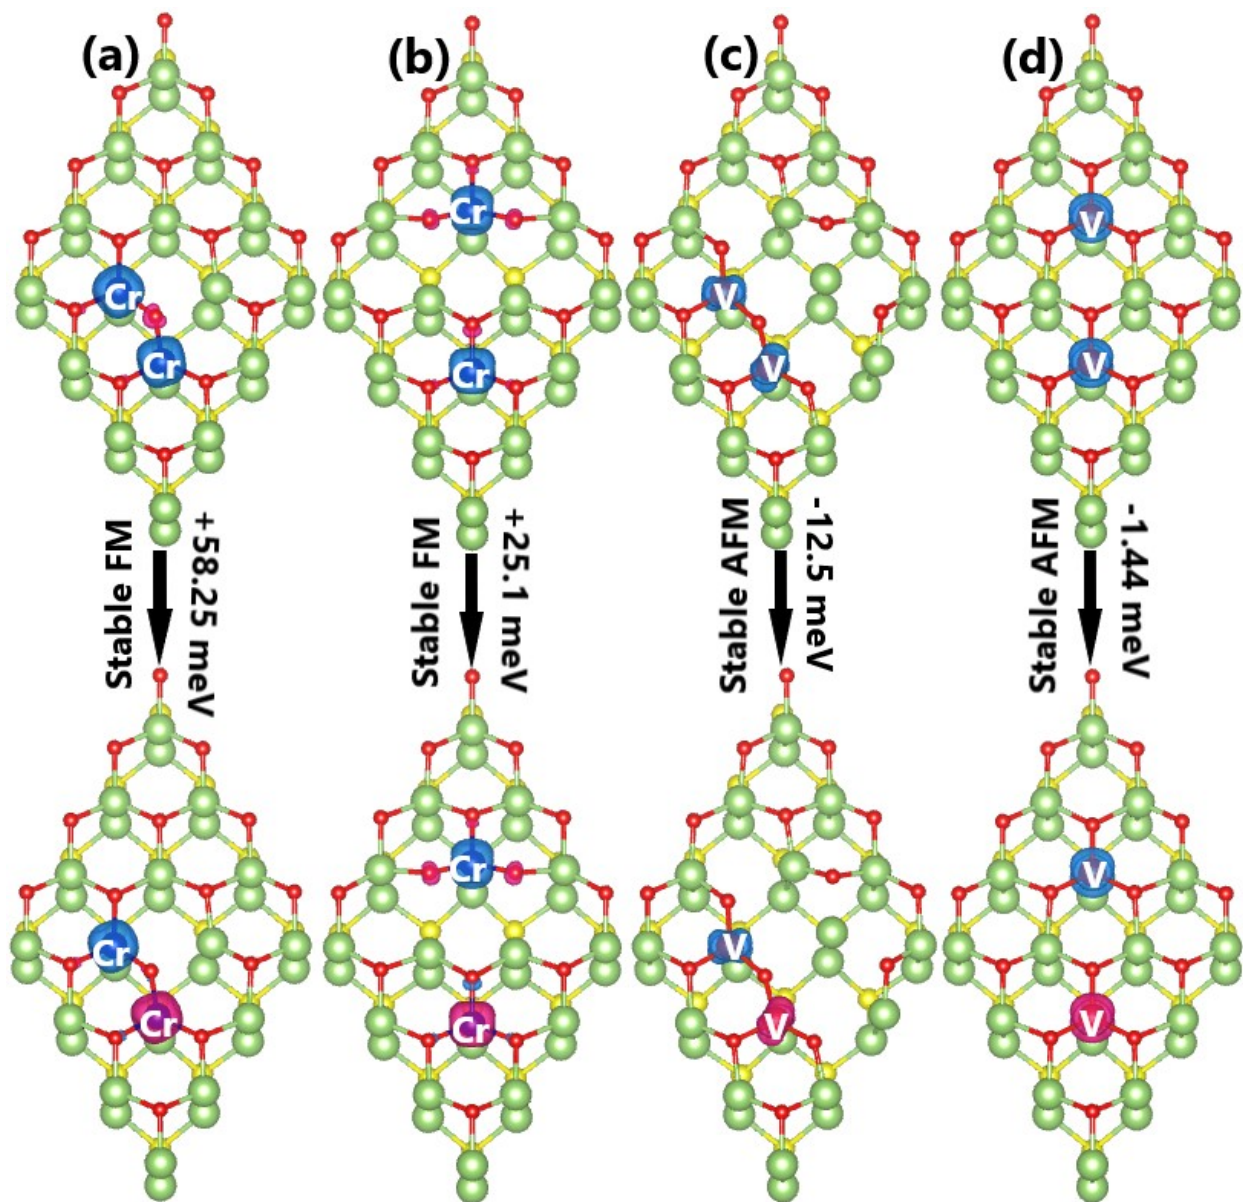

Figure S4: Energy of magnetic state transition in Ga<sub>2</sub>SO monolayer doped with (a-b) Cr atoms and (c-d) V atoms at Ga<sub>2</sub> sublattice.
